# Supplementary material
Source: publisher figshare collection journal article supplement (https://tandf.figshare.com/ndownloader/files/6616929)

**GRAPHICAL ABSTRACT:**


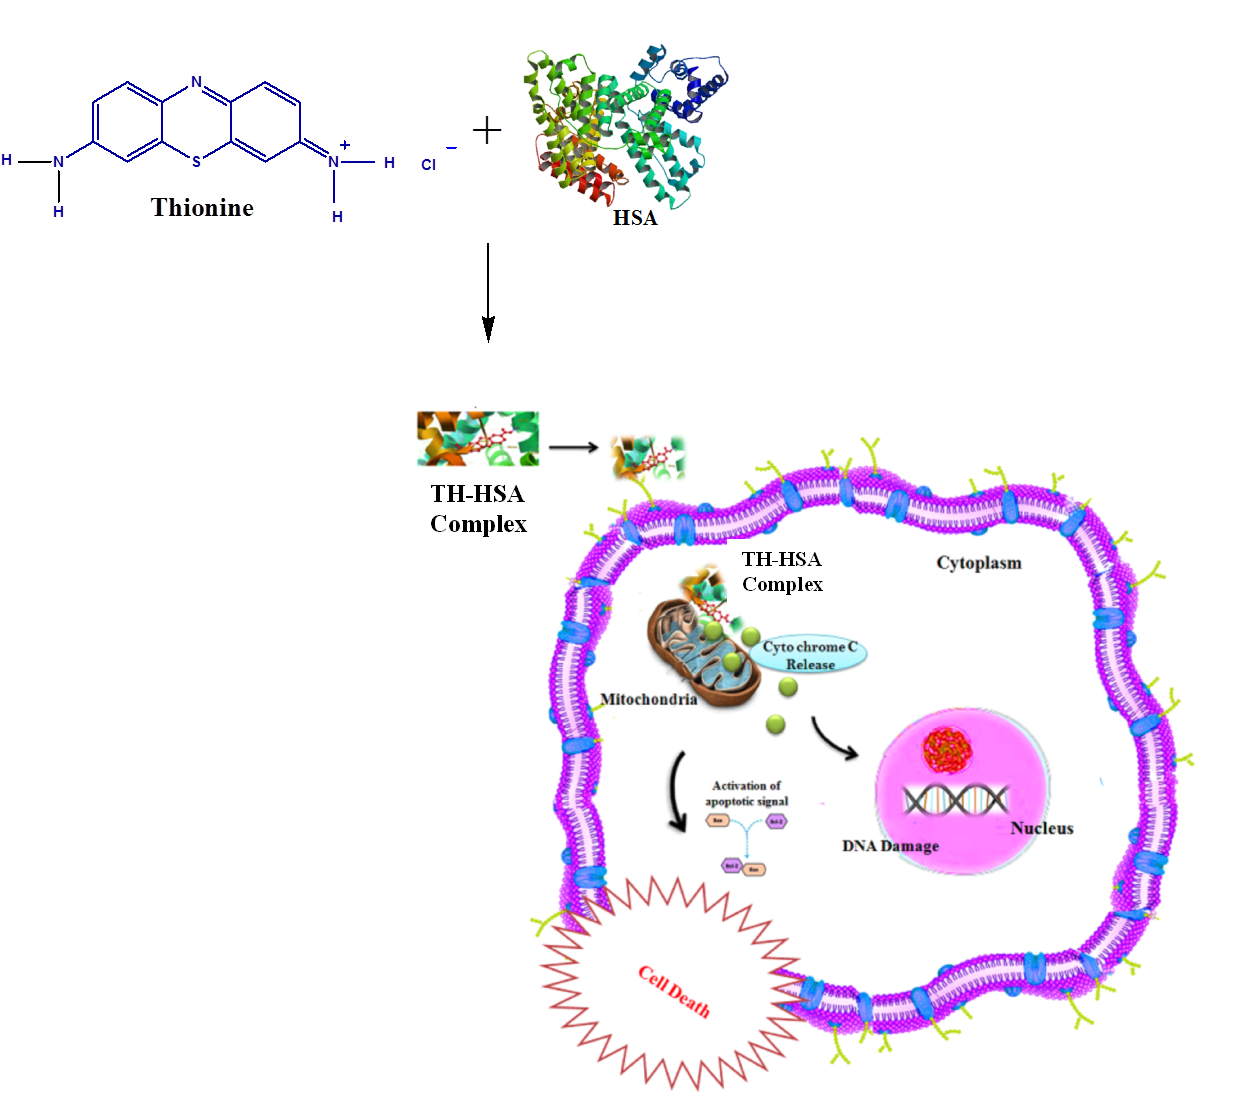

Supplement: Supplementary file 1 [file 6616929]
